# Low-rank Similarity Matrix Optimization Identifies Subpopulation Structure and Orders Single Cells in Pseudotime

Shuxiong Wang<sup>1</sup>, Adam L MacLean<sup>1,2</sup>, Qing Nie<sup>1\*</sup>

*1* Department of Mathematics, Center for Complex Biological Systems, and Center for  
Mathematical and Computational Biology, University of California, Irvine, CA 92697,  
USA

\*[qnie@uci.edu](mailto:qnie@uci.edu)

---

## Abstract

Sequencing the transcriptomes of single cells has greatly advanced our understanding of the cellular composition of complex tissues. In many of these systems, the role of heterogeneity has risen to prominence as a determinant of cell type composition and lineage transitions. While much effort has gone into developing appropriate tools for the analysis and comprehension of single cell sequencing data, further advances are required. Optimization-based approaches are under-utilized in single cell analysis and hold much potential due to their ability to capture global properties of the system in low dimension. Here we present SoptSC: an optimization-based algorithm for the identification of subpopulation structure, transition paths, and pseudotemporal ordering within a cell population. Based on a measure of similarity between cells, SoptSC uses non-negative matrix factorization to create low dimensional representations of the data for analysis and visualization. We find that in several examples, the low-dimensional representations produced by SoptSC offer greater potential for insight than alternative methods. We tested our methods on a simulated dataset and four published single cell datasets from *Homo sapiens* and *Mus musculus*. SoptSC is able to recapitulate a simulated developmental trajectory with greater fidelity than comparable methods. Applied to two datasets on early embryonic development, SoptSC recapitulates known trajectories with high accuracy. Analysis of

---

<sup>2</sup>Orcid ID: [orcid.org/0000-0003-0689-7907](https://orcid.org/0000-0003-0689-7907)

murine epidermis reveals overall agreement with previous studies, but differs markedly regarding the composition and heterogeneity of the basal compartment. Analysis of murine myelopoiesis found that SoptSC can resolve complex hematopoietic subpopulation composition, and led to a new prediction regarding the asynchronous development of myeloid subpopulations during stem cell differentiation.

*Keywords:* optimization, similarity measure, non-negative matrix factorization, dimensionality reduction, single cell analysis, hematopoiesis, epidermal homeostasis, embryonic development

---

## 1. Introduction

Multicellular life can be defined by the collection of cell types present within an organism, their developmental trajectories, and potential interchange between types via cell state transitions throughout lifetime. Cell type is in turn controlled by the transcriptional state of a cell, together with interplay from proteomic and epigenetic factors. Our ability to measure the transcriptional state of a cell — and thus approach an understanding of its type or fate — has advanced dramatically within the past few years [1] due in part to high-throughput single-cell RNA sequencing (scRNA-seq) [2, 3, 4, 5]. This move away from bulk [6, 7, 8] to single-cell sequencing permits delineation of the different sources of heterogeneity from within a population, an increasingly important task given the preeminent role of biological noise in such data (e.g. [9, 10]). In addition, scRNA-seq analyses have promoted the identification of new (rare) cell types [11, 12], challenged classical models of cellular lineage hierarchies [13, 10], and deepened our knowledge of various developmental trajectories [14, 15].

scRNA-seq experiments yield measurement of  $\mathcal{O}(10^4)$  genes in hundreds to thousands (and rapidly approaching  $> 10^5$  [1]) cells across multiple time points and perturbations. Computational approaches are essential for the analysis of such high-dimensional datasets. Typical scRNA-seq analysis pipelines include clustering, pseudotemporal ordering of cells, and identification of marker genes, all of which require a dimensional reduction step [16, 17]. Dimensional reduction, e.g. via principal components analysis (PCA), t-distributed stochastic neighbor embedding (tSNE), etc., can also be performed directly for visualization purposes [18, 19]. Clustering — specifically the identification of functionally relevant (sub-)populations of cells and,

27 ideally, the relationships between them [20] — presents a crucial challenge  
28 for the interpretation of scRNA-seq datasets. “Pseudotemporal” ordering  
29 projects cells onto a pseudotime axis that may represent (e.g.) a develop-  
30 mental process, or stem cell differentiation, and can deviate from real time  
31 due to the unsynchronized nature of single cells [21, 14]. Discontinuities in  
32 cellular fate transitions further complicate the analysis of pseudotime [9].

33 A number of factors present challenges for scRNA-seq analysis, including  
34 systematic noise, the dropout effect, sparsity, sensitivity to parameters, and  
35 non-uniqueness of outputs [22, 23]. The most significant of these, in our opin-  
36 ion, is appropriate consideration of the (biological and measurement) noise  
37 present in such data. Current methods for pseudotemporal ordering struggle  
38 to handle noise by selecting marker genes based on prior knowledge, pro-  
39 jecting data into lower dimensional space and constructing diffusion distance  
40 etc [21, 24, 25].

41 Optimization generally seeks to find parameter values that maximize or  
42 minimize a real-valued function subject to given constraints [26, 27]. Op-  
43 timization methods have found widespread use throughout computational  
44 systems biology, from early uses for the analysis of ecological or life history  
45 models [28, 29], to network inference or parameter estimation of biochemical  
46 reaction networks [30]. Optimization methods have the inherent advantages  
47 that they are able to retain global aspects of the input data through low-rank  
48 regularization, and they preserve local structure using a neighborhood pro-  
49 jection constraint. This makes them significantly more robust to the effects  
50 of biological noise, as we will show below.

51 Here we present SoptSC (*sopt-see*): Similarity matrix-based optimization  
52 for Single-Cell analysis; a method for reconstructing the pseudotemporal or-  
53 dering of cells, *de novo* identification of subpopulations, and identification  
54 of the transition paths between these subpopulations. SoptSC constructs a  
55 cell-to-cell similarity matrix, upon which non-negative matrix factorization  
56 (NMF) is performed to find a low-rank representation of the relationships be-  
57 tween individual cells: rank-1 factorization determines the pseudotime axis;  
58 rank- $k$  factorization clusters the cells into  $k$  distinct subpopulations. Key  
59 advantages of this approach include: *i*) optimization guarantees that coeffi-  
60 cients of the linear representation are nonzero only in a local neighborhood  
61 of the data point, thus preserving the intrinsic geometric structure of the  
62 manifold; *ii*) the low-rank constraint enables SoptSC to capture global prop-  
63 erties of the data while remaining robust to biological noise and outliers [31];  
64 *iii*) SoptSC predicts the number of subpopulations present in the data in

65 an unsupervised manner; *iv*) the method is insensitive to ‘nuisance’ genes,  
66 i.e. those which are not relevant to the trajectory or process currently being  
67 studied.

68 The remainder of the paper is organized as follows: in the next section we  
69 describe the methods and algorithmic design of SoptSC; we then test its per-  
70 formance by comparison to existing methods for clustering and dimensional  
71 reduction using *in silico* data. We go on to apply SoptSC to four biological  
72 datasets, and find not only that we can comprehensively recapitulate the  
73 results of previous analyses, but that SoptSC also generates new insight into  
74 the cellular relationships and developmental trajectories of adult stem cell  
75 systems.

## 76 2. Methods

77 Here we describe SoptSC, an optimization-based algorithm that enables  
78 the de novo detection of subpopulations, pseudotemporal ordering, and cell  
79 subpopulation transition paths from single cell gene expression datasets.  
80 SoptSC is based on the concept of similarity between cells, i.e. we find a  
81 low-rank representation of a cell (here we use ‘cell’ to mean the vector of  
82 gene expression values for a cell) in terms of other cells within a given neigh-  
83 borhood. For each cell, the similarity score is thus defined by a set of linear  
84 coefficients (the solution of the low-rank optimization model) in a subspace  
85 given by its neighboring cells. This measure is quite distinct from distance-  
86 based metrics often used to define similarity.

87 The SoptSC algorithm consists of two optimization steps. In the first, a  
88 square matrix is constructed that describes the cell-to-cell similarities based  
89 on the input gene expression data. In the second step, low-rank approxima-  
90 tions of the similarity matrix are calculated to define either (*i*) cell subpop-  
91 ulations within the data (rank- $k$ , where  $k$  is the number of subpopulations),  
92 or (*ii*) pseudotemporal ordering of cells (rank-1). Via the construction of a  
93 transition matrix from the similarity matrix, we identify the transition paths  
94 between cell subpopulations. To determine the number of subpopulations,  $k$ ,  
95 we propose a novel algorithm that finds the consensus matrix ( $S^C$ ) for range  
96 of values of  $k$ , specified by a suitable prior, and then estimates the value of  
97  $k$  from the eigenvalue spectra of the graph Laplacian of  $S^C$ .

98 **2.1. Construction of the cell-to-cell similarity matrix**

The input to SoptSC is a single cell gene expression matrix:

$$X = \begin{bmatrix} \dots & \dots & \dots \\ \dots & X_{i,j} & \dots \\ \dots & \dots & \dots \end{bmatrix} \in \mathbb{R}^{m \times n},$$

with  $m$  genes ( $1 \leq i \leq m$ ), and  $n$  cells ( $1 \leq j \leq n$ ), i.e. the element  $X_{i,j}$  represents the expression value of the  $i^{\text{th}}$  gene in the  $j^{\text{th}}$  cell. SoptSC computes the coefficient matrix  $Z$  from  $X$  by the following optimization model:

$$\begin{aligned} \mathcal{P}_1 : \min_Z \quad & \lambda \|X - XZ\|_{2,1} + \|Z\|_* \\ \text{s.t.} \quad & Z^\top \mathbf{1} = \mathbf{1}, \\ & Z_{i,j} = 0, (i,j) \in \bar{G}, \end{aligned}$$

99 where  $\|\cdot\|_{2,1}$  is the  $L_{2,1}$  norm (the sum of the Euclidean norm of all columns);  
 100  $\|\cdot\|_*$  is the nuclear norm;  $\lambda$  is a non-negative parameter and  $\mathbf{1} = (1, \dots, 1)^\top$   
 101 is a vector of ones of length  $n$ .  $\bar{G}$  defines the complement of  $G$ , where  $G$   
 102 is the set characterizing neighbor relationships between cells, i.e. cell pairs  
 103  $(i, j) \in G$  mean that cell  $i$  is in the neighborhood of cell  $j$ .  $G$  is obtained  
 104 using  $K$ -nearest neighbors [32], and we choose  $K = \min\{0.1m, 20\}$ . The  
 105 coefficient matrix  $Z$  was found to be robust to changes in  $K$ . The linear  
 106 constraint  $Z^\top \mathbf{1} = 1$  guarantees translational invariance of the data [33].

The optimization model  $\mathcal{P}_1$  is a representation method for the construction of graphs from nonlinear manifolds [31]. Informally, this captures the relationships between cells by representing each cell as a linear combination of all other cells. By restricting coefficients of non-neighboring cells to be zero, the model preserves the local structure of the linear representation. By imposing the low rank constraint, the model can better capture the global structure of the overall single cell gene expression data, and is more robust to noise and outliers. The optimization problem  $\mathcal{P}_1$  can be solved numerically by the alternating direction method of multipliers [31]. Let  $Z^*$  be the optimal solution of  $\mathcal{P}_1$ , then via symmetric weights we define the similarity matrix  $S$  as

$$S = \max \{|Z^*|, |Z^{*\top}|\}. \quad (1)$$

107 The elements  $S_{i,j}$  of  $S$  thus quantify the degree of similarity between cell  $i$   
 108 and cell  $j$ .

109 **2.2. Rank- $k$  NMF for cell subpopulation clustering**

In order to classify cells into subpopulations based on their similarity, we use symmetric non-negative matrix factorization (NMF) [34, 35], which can be regarded as a graph-based clustering method. The (non-negative) similarity matrix  $S$  is decomposed into a product of a non-negative low rank matrix  $H \in \mathbb{R}_+^{n \times k}$  and its transpose  $H^\top$  via the optimization problem:

$$\mathcal{P}_2 : \min_{H \in \mathbb{R}^{n \times k}} \|S - HH^\top\|_F^2 \\ \text{s.t. } H \geq 0,$$

where  $k$  is the number of subpopulations of cells and  $\|\cdot\|_F$  is the Frobenius norm. The low rank condition for  $H$  is ideally suited for capturing the clustered nature of the cell subpopulations, i.e. by reordering  $S$  according to the columns of  $H$ , a block-diagonal or near-block-diagonal structure can be obtained (see Fig. 1A). We denote the reordered similarity matrix  $S^B$ . The structure of  $S^B$  is such that cells within a block have high similarity to each other and low similarity to cells from other blocks. It can be shown that the solution of  $\mathcal{P}_1$  is strictly block-diagonal when the data are clean and sampled from independent subspaces [36]. Due to this observation, the similarity matrix  $S$  can be approximated by a sum of rank one matrices  $H^i H^{i\top}$ ,  $i = 1, 2, \dots, k$ , where  $H = [H^1, H^2, \dots, H^k]$ , which can be obtained by solving the NMF problem  $\mathcal{P}_2$ . Singular value decomposition is used to find  $H_0$ , an initial low-rank non-negative matrix required as an input for  $\mathcal{P}_2$  [37]. If we now let  $S = [S^1, S^2, \dots, S^n]$  represent the columns of  $S$ , then the columns of  $S$  can be approximated by the space spanned by the columns of  $H$  as:

$$S^i \approx \sum_{j=1}^k H_{i,j} H^j.$$

110 Thus, the columns of  $H$  represent a basis for  $S$  in the (low rank)  $k$ -dimensional  
111 space, and the columns of  $H^\top$  provide the coefficients for their corresponding  
112 columns of  $S$  in the space spanned by the columns of  $H$ .

113 Since  $H \geq 0$ , each column of  $H^\top$  can be viewed as a distribution for which  
114 the  $i^{\text{th}}$  column  $S^i$  has the component in the corresponding column of  $H$ . We  
115 can use  $H^\top$  to classify the  $N$  cells into  $k$  subpopulations by assigning the  $i^{\text{th}}$   
116 cell to the  $j^{\text{th}}$  subpopulation when the largest element among all components  
117 of the  $i^{\text{th}}$  column of  $H^\top$  lies in the  $j^{\text{th}}$  position.

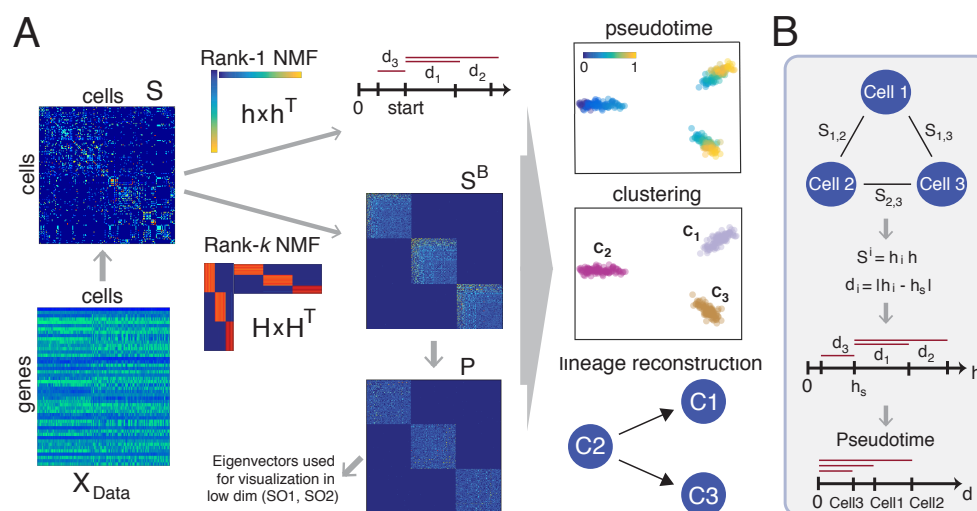

Figure 1: **Overview of SoptSC.** (A) Pipeline of the SoptSC algorithm. An input matrix  $X_{Data} \in \mathbb{R}^{m \times n}$  (measuring  $m$  genes in  $n$  cells) is used to construct the cell-to-cell similarity matrix  $S$  by solving an optimization problem on the coefficients of  $X$ . Rank- $k$  non-negative matrix factorization (NMF) is then performed (where for pseudotime  $k = 1$ , and for clustering  $k > 1$ ) to find low-rank representations of  $S$ . These are used to order cells in pseudotime or cluster cells into subpopulations. From the transition matrix  $P$  lineage relationships are inferred, and eigenvectors of  $P$  are used to visualize the data in low dimension. (B) Schematic of the pseudotime algorithm.  $S_{i,j}$  is the similarity between cells  $i$  and  $j$ . Then  $h$  characterizes the rank-1 NMF used to decompose  $S$ . from  $h$ , distances for each cell  $i$  in pseudotime are calculated ( $d_i$ ) by choosing an initial start point  $h_s$  and ranking cells accordingly. See Methods for full details.

118 **2.3. Identification of  $k$  from eigenspectra of the graph Laplacian**

119 Determining the number of clusters in a dataset is a fundamental prob-  
120 lem extending far beyond the identification of cell populations from single-cell  
121 data; many clustering algorithms still require the user to specify the num-  
122 ber of clusters. We propose a method to automatically identify the number  
123 of clusters within a dataset based on properties of the graph Laplacian ( $L$ )  
124 and the consensus similarity matrix [38], which is similar to [39]. We con-  
125 sider a range of values:  $k_i = \{k_1, k_2, \dots, k_q\}$ , which can be viewed as a prior  
126 distribution for the number of cell subpopulations.

127 It has been shown that the number of eigenvalues of  $L$  equal to 0 is  
128 equivalent to the number of diagonal blocks of  $L$  [38].

129 The steps required to determine the number of clusters  $k$  are as follows:

- 130 1. Given the inputs  $S$  and  $k_i, i \in (1, 2, \dots, q)$ , partition the cells into  $k_i$   
131 subpopulations by solving the NMF problem  $\mathcal{P}_2$ .
2. Find the consensus matrix [40, 41],  $S^C$ . For each  $j \in (1, 2, \dots, q)$ , define  
a matrix  $M^j$  by

$$M_{p,q}^j = \begin{cases} 1 & \text{if } p \text{ and } q \text{ belong to the same cluster} \\ 0 & \text{otherwise.} \end{cases}$$

The consensus matrix  $S^C$  is then defined by

$$S^C = \sum_{j=1}^q M^j$$

- 132 3. Prune the consensus matrix as follows: set a tolerance  $\tau \in [0, 0.5]$ , and  
133 let  $S_{i,j}^C = 0$  if  $S_{i,j} \leq \tau q$ . This increases the robustness of consensus  
134 clustering to biological noise.
4. Compute the graph Laplacian  $L$  and its eigenvalues, given the identity  
matrix  $I$  and a diagonal matrix  $D$  such that:

$$L = I - D^{-1/2} S^C D^{-1/2}$$

$$\text{with } D_{ii} = \sum_{j=1}^n S_{i,j}^C.$$

- 135 5. Find (i) the number of eigenvalues that are close to zero, and (ii) the  
136 index at which the largest eigenvalue gap occurs [38].



137 An initial estimate for  $k$  is given by (i). In cases where there may be  
138 significant sources of noise in the data, or where other uncertainties exist,  
139 we can use (ii) instead as an estimate of  $k$ . Especially for cases displaying  
140 a prominent largest eigenvalue gap (see e.g. Fig 5G below), (ii) can provide  
141 a better estimate of the subpopulation structure present in the data. For  
142 all analyses performed below, we choose a prior  $k_i$  so the number of clusters  
143 ranges from 1 to 25, and we set the tolerance  $\tau = 0.3$ .

#### 144 **2.4. Rank-1 NMF to determine pseudotemporal ordering**

Most algorithms for pseudotemporal ordering of cells proceed via graph-based methods. Here we propose an alternative method to rank cells in pseudotime based on similarity properties, rather than a distance measure. Specifically, we use the rank-1 non-negative matrix factorization of  $S$  to characterize the pseudotemporal ordering of cells. The rank-1 NMF matrix  $h = [h_1, h_2, \dots, h_n]$  can be obtained by setting  $k = 1$  in the optimization problem  $\mathcal{P}_2$ . In this case, the overall structure of  $S$  can be approximated by  $h$ , i.e.,

$$S \approx hh^\top.$$

145 It follows immediately that each of the columns of  $S$ , denoted  $S^i$ , can be rep-  
146 resented by a single vector  $h$ , and a non-negative coefficient  $h_i$ , i.e.  $S^i \approx h_i h$ .  
147 Then the non-negative coefficient  $h_i$  can be used to measure the similarity  
148 of  $S^i$  to  $h$ . If the starting cell is denoted the  $s^{th}$  cell, then a new vector  
149  $d = [d_1, d_2, \dots, d_n]$  can be defined where  $d_i = |h_i - h_s|, i = 1, 2, \dots, n$ . Each  
150 element of  $d$  represents the relative distance from cell  $i$  to the initial cell  $s$ .  
151 The temporal order of cells is then obtained by sorting  $d$  in ascending order.

152 High levels of noise lead to challenges for estimation of pseudotime in the  
153 sense that the obtained similarity matrix might not fully capture similarity  
154 among all cells. In an effort to combat this, instead of using the similarity  
155 matrix directly, we propose to alternatively use the transition matrix  $P$  (de-  
156 fined below), and we compute pseudotemporal ordering through two steps:  
157 1) compute the first  $J$  largest eigenvectors of  $P$  (the default value is set as  
158  $J = 6$ ); 2) use these eigenvectors as input and perform rank-1 NMF to obtain  
159 the pseudotemporal ordering.

#### 160 **2.5. Identification of cell subpopulation transition paths**

161 Following the identification of the number of cell populations present, and  
162 assigning cells to their relevant subpopulations, here we infer the transition

163 paths between these subpopulations in order to identify the cellular hierarchy  
164 present in the data. As above, we use similarity measures to determine the  
165 probabilities of transition between cell subpopulations, by first defining a  
166 transition matrix, and then using this to compute a minimum spanning tree  
167 between cell subpopulations.

The transition matrix  $P$  is defined by:

$$P = D^{-1}S,$$

168 where  $D$  is a diagonal matrix defined by  $D_{ii} = \sum_{j=1}^n S_{i,j}$ . For visualization  
169 purposes below, we calculate the eigenvectors of  $P$  and use the second two  
170 eigenvectors as components for visualization (SO1 and SO2). We do not use  
171 the first eigenvector as it is trivially defined as  $\mathbf{1} = (1, 1, \dots, 1)$ . We then  
172 project  $P$  into low (three) dimensional space via principal components anal-  
173 ysis (PCA) [42], and construct a complete weighted graph between the cell  
174 subpopulations using the centroids of the subpopulations as vertices and the  
175 distances between centroids as the weights. Then by setting a root node (the  
176 initial cell population), we can construct the minimum spanning tree for this  
177 graph: determining the order of transitions between the cell subpopulations.

## 178 **2.6. Generation of in silico data for performance assessment**

179 To assess the performance of SoptSC, we construct a dataset for which  
180 the cell subpopulations and transition paths are known. The expression levels  
181 of genes were set as a function of a parameter  $t$  which can be regarded as cel-  
182 lular “differentiation time”. Three distinct functions are used for simulation,  
183 where the expression values of genes generated by a functions are analogous  
184 to responses from a common biological mechanism [24]. The functions used  
185 (two nonlinear and one constant) are:

$$\begin{aligned} f_1(t) &= c_1 \cos(t/3) + 1 + \epsilon_1, \\ f_2(t) &= c_2 \sin(t/3) + 1 + \epsilon_2, \\ f_3(t) &= 1 + \epsilon_3, \end{aligned}$$

186 where  $c_i \sim N(1, \sigma^2)$  ( $i = 1, 2$ ) and  $\epsilon_i \sim N(0, \sigma^2)$  ( $i = 1, 2, 3$ ). For each  
187 function, the expression levels of genes were simulated by sampling the ran-  
188 dom variables  $c_i$  and  $\epsilon_i$ . We chose 170 values of  $t$  as input to the first two  
189 functions  $f_1(t), f_2(t)$  from the interval  $[2\pi, 4\pi]$  to simulate two distinct cell

190 subpopulations. In order to simulate ‘trajectory like’ data in 2-dimensional  
191 space, we introduce the third function  $f_3(t)$  on the interval  $[-0.5, -0.1]$  to  
192 generate a third cell subpopulation containing 100 cells. In order to obfuscate  
193 this trajectory, we then add genes unrelated to the process being studied; we  
194 can vary this number of “nuisance” genes to test the performance of each  
195 method.

### 196 3. Results

#### 197 3.1. *SoptSC captures salient features of single cell data and out-* 198 *performs other methods when data are noisy*

199 We applied SoptSC to an *in silico* dataset that contains three subpopu-  
200 lations located close to one another in gene space, which follow a nonlinear  
201 developmental trajectory, with  $X_{Data} = 52 \times 270$  (see Methods for full de-  
202 tails). As a first step, we studied low-dimensional projections of the data  
203 in order to assess, at a general level, which features of the data are cap-  
204 tured by SoptSC in comparison with principal component analysis (PCA)  
205 or t-distributed stochastic neighbor embedding (tSNE), two widely-used di-  
206 mensional reduction techniques for single cell analysis [19].

207 We varied the noise level by manipulating the relative standard deviation,  
208 defined as the ratio of  $\sigma$  to the mean of data, from 10-30% by choosing dif-  
209 ferent values of  $\sigma$ , and visualized the known subpopulation structure of the  
210 data (three subpopulations) using the first two components of each method  
211 (Fig. 2). We can thus assess each method as we study the projections pro-  
212 duced under increasing noise. At 10% noise (Fig. 2A) we observe that all  
213 three methods capture three distinct subpopulations, but tSNE loses the dis-  
214 tinct shape of the developmental trajectory. At 20% noise (Fig. 2B), tSNE  
215 can distinguish neither the trajectory nor the subpopulation structure. PCA  
216 and SoptSC both retain the subpopulation structure, but PCA loses repre-  
217 sentation of the trajectory, which SoptSC retains. At 30% noise (Fig. 2C),  
218 clear distinction between subpopulations or the shape of the developmental  
219 trajectory is lost for all three methods. We note that a 30% noise level may  
220 be low in comparison with some real datasets. These results highlight the  
221 general challenge of meaningful low-dimensional data representations when  
222 “true” biological subpopulations are located close to one another in high  
223 dimensional space.

224 Clustering methods rely crucially on identifying how many subpopula-  
225 tions are present in a given sample. This is in general a difficult problem,

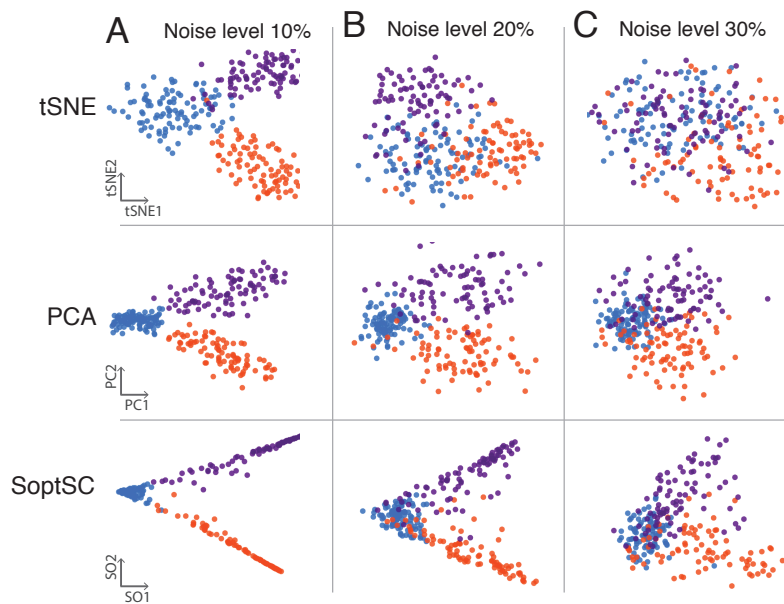

Figure 2: **Comparison of low-dimensional data representations by tSNE, PCA, and SoptSC.** The first two dominant components of the transition matrix (SO1 and SO2) are used to project the *in silico* data into 2D space, with varying levels of Gaussian noise: (A) 10%; (B) 20%; and (C) 30%. Cells are colored according to their true subpopulation labels.

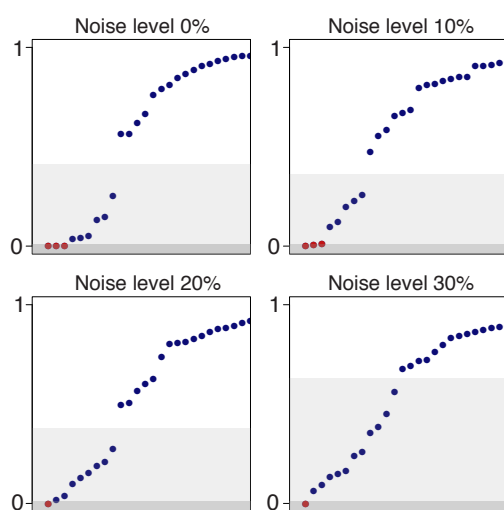

**Figure 3: Number of subpopulations within a dataset as identified by SoptSC.** The first 25 eigenvalues of the graph Laplacian of  $S^C$ , the consensus similarity matrix, are shown at different noise levels. Number of eigenvalues approximately zero (threshold = 0.01; dark gray region) predicts the number of subpopulations (marked in red). Number of eigenvalues below the largest eigengap (light gray region) provides secondary prediction of the number of subpopulations.

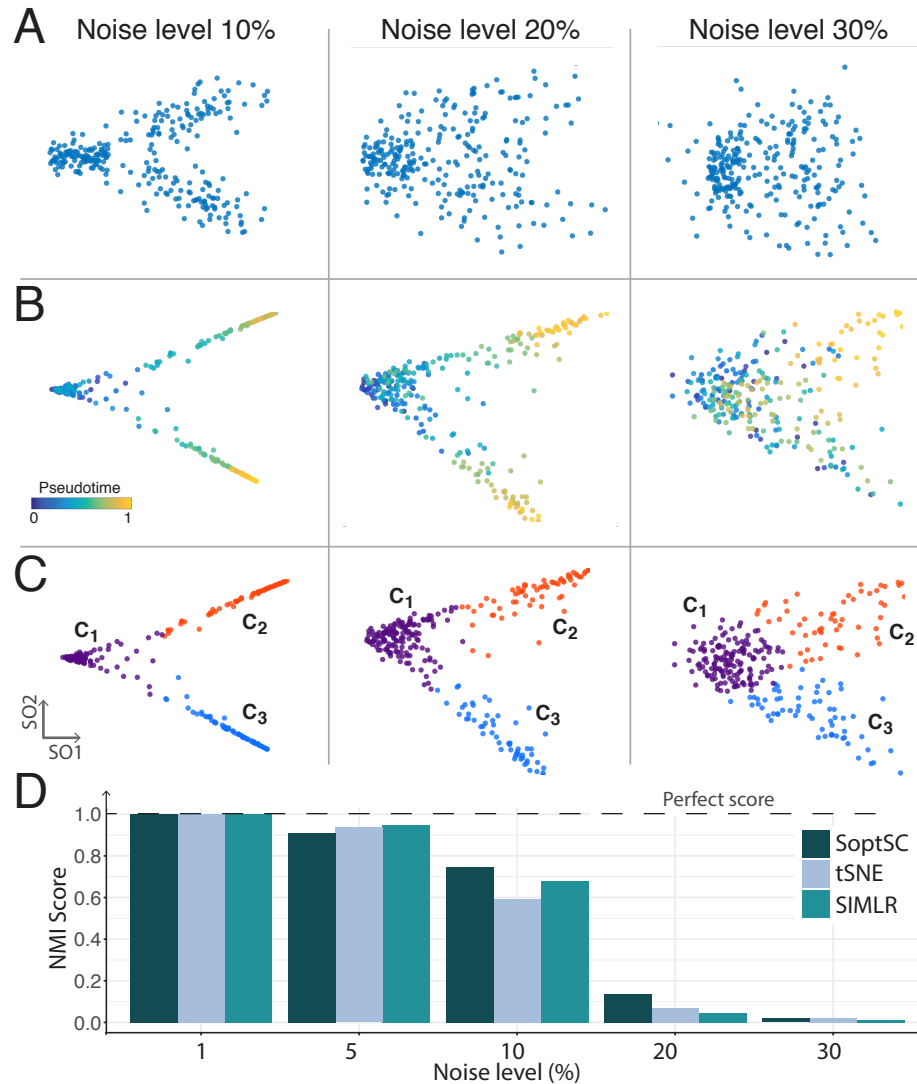

Figure 4: **Performance of SoptSC for pseudotemporal ordering and clustering.** (A) Original data used as input (true labels hidden). (B) Pseudotemporal ordering by rank-1 NMF. (C) Clustering of cells by rank-3 NMF. (D) Comparison of clustering performance of SoptSC against k-means or SIMLR clustering algorithms. The normalized mutual information (NMI) is used to assess predictions.

226 and one that is compounded by the presence of noise, which is unavoidably  
227 widespread in scRNA-seq datasets. The output for the method we use to  
228 identify the number of subpopulations is illustrated in Fig. 3 (details given  
229 in Methods). We use the *in silico* dataset described above for testing; the  
230 number of eigenvalues close to zero is used to predict the number of subpop-  
231 ulations.

232 We see that at 0-10% noise, SoptSC can correctly identify that the data  
233 contain three subpopulations. At 20-30% noise, this structure can no longer  
234 be recovered by our algorithm; we note here that given 20-30% noise there is  
235 in fact little population structure left to recover (see Fig. 2). The light gray  
236 regions on Fig. 3 demarcate the number of eigenvalues below the largest gap  
237 in the eigenspectrum. This number can be used as a secondary estimate of  
238 structure, e.g. indicating the presence of hidden subpopulations, and can be  
239 used especially for clustering heterogeneous data, i.e. at 20% noise, the same  
240 number of hidden subpopulations are recovered as for 0-10% noise ( $\pm 1$ ).

241 In Fig. 4 we test the ability of SoptSC to project cells in pseudotime and  
242 identify subpopulations, and we compare the results of clustering to other  
243 current methods. In the input data the true subpopulation labels are hidden  
244 and noise is added to perturb the cells in gene expression space (Fig. 4A). In  
245 Fig. 4B we plot the pseudotemporal ordering of cells at different noise levels.  
246 We see that for up to 20% noise a clear developmental trajectory through  
247 pseudotime can be obtained, but that at 30% noise our pseudotemporal or-  
248 dering is no longer reliable. We then cluster the data in SoptSC via rank-3  
249 NMF, and find that even at a 30% noise level, it is still possible to identify  
250 three subpopulations with good accuracy. In order to quantify performance,  
251 we repeat this clustering at different noise levels up to 30%. We compare  
252 the performance of SoptSC to two alternative methods: a recently published  
253 algorithm SIMLR [43]; and K-means clustering in 2D space following dimen-  
254 sional reduction by tSNE [44, 19]. Normalized mutual information (NMI) is  
255 the metric used for comparison [45, 46]. The results in Fig. 4D show that  
256 as the noise varies from 1-10% SoptSC performs similarly or marginally bet-  
257 ter than alternative methods (no significant differences). At the 20% noise  
258 level, SoptSC outperforms the other methods, however none of the methods  
259 attain high scores at this noise level. At the 30% noise level, none of the  
260 methods are able to cluster these data successfully. These results are in line  
261 with our central proposal: that optimization-based dimensional reduction  
262 and clustering methods are well-suited to handling biological noise.

263 *3.2. SoptSC recapitulates known developmental trajectories in hu-*  
264 *man and mouse early embryonic single cell data*

265 Development of the early embryo — from oocyte to blastocyst — has  
266 been intensely studied in humans and other mammals [47, 48]. With the  
267 introduction of widespread scRNA-seq, we are now able to interrogate the  
268 beginnings of life in new detail, by characterizing the transcriptomes of single  
269 cells in these early stages [49, 50]. As a test of SoptSC, we chose to analyze  
270 two single cell embryonic datasets, from a mouse study [49] and a human  
271 study [50]. On each dataset, we ran SoptSC to extract the subpopulation  
272 structure and pseudotemporal ordering of cells and compared the results to  
273 previously characterized trajectories. These data are particularly suitable  
274 for testing our algorithm since they display clear temporal trajectories as  
275 the embryos grow. In addition, they have relatively low dimension either in  
276 number of genes (in the mouse dataset) or number of cells (in the human  
277 dataset), thus providing us with good first-step benchmarks with which to  
278 test SoptSC.

279 First we study 48 qPCR gene expression profiles in 438 individual cells  
280 taken from early stage mouse embryos, published by Guo et al [49]. These  
281 data describe the six cell doublings between zygote and 64-cell stage. Two  
282 well-characterized cell bifurcation/differentiation events occur during this  
283 progression, one at the 32-cell stage, and one at the 64-cell stage [51, 52]:  
284 at the 32-cell stage, totipotent cells branch into trophectoderm and inner  
285 cell mass (ICM); at the 64-cell stage, the ICM branches into primitive en-  
286 doderm and epiblast. Therefore, we expect to find two distinct subpopula-  
287 tions emerge at the 32-cell stage, and another two distinct subpopulations  
288 to emerge at the 64-cell stage. The results of SoptSC are visualized in the  
289 2D projection given by the first two dominant components of the transition  
290 matrix (SO1 and SO2). We begin by labelling cells with their true embryonic  
291 stage as given in [49] (Fig. 5A). The results produced by SoptSC for these  
292 data are shown in Fig. 5B-C,G.

293 SoptSC clusters the data into eight subpopulations (Fig. 5B). Shown in  
294 Fig. 5G is the eigenspectrum used to estimate the number of subpopulations  
295 present: the largest gap occurs after the eighth eigenvalue. Also shown in  
296 Fig. 5G are the similarity matrices constructed for all cells, and separately  
297 for the 32-cell and the 64-cell stage. Each of these displays clear structure:  
298 identifying eight subpopulations for all cells, and the two branch points that  
299 lead to two subpopulations at the 32-cell stage, and three subpopulations at  
300 the 64-cell stage.



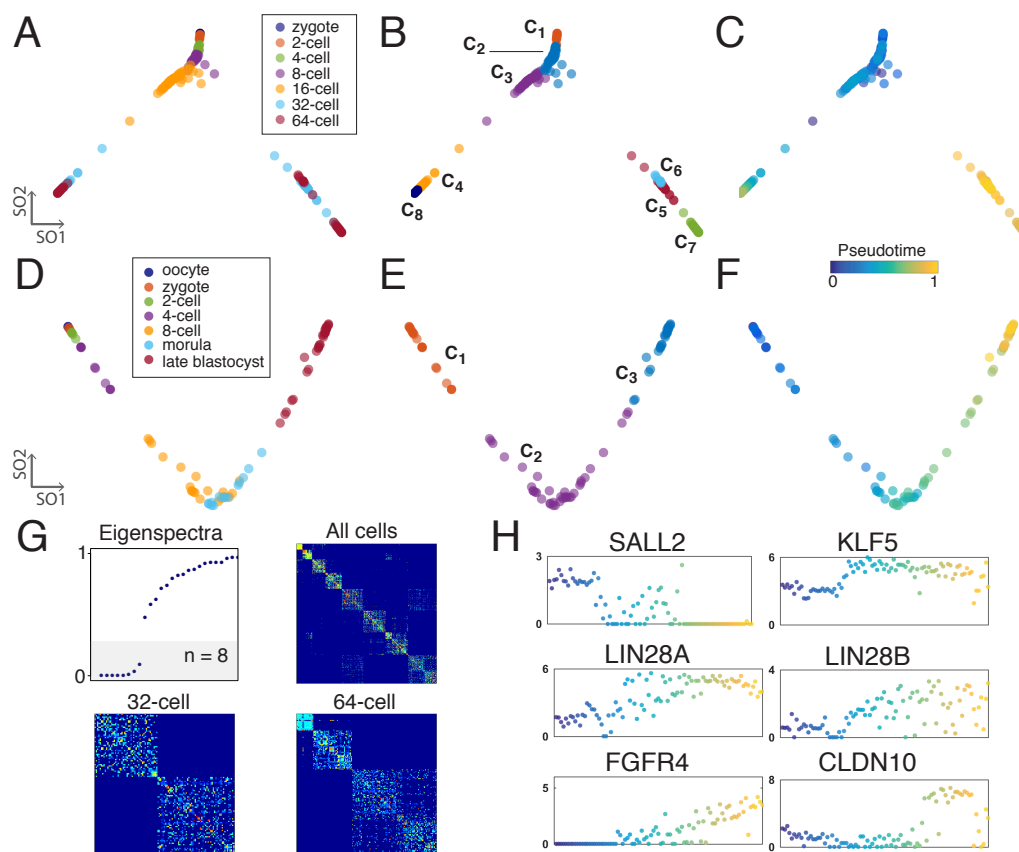

Figure 5: **SoptSC identifies cell subpopulations and developmental dynamics of single cell data from mouse and human early embryonic development [49, 50].** (A) Low dimensional projection using SoptSC of qPCR profiles from 438 single cells, developmental stages labelled according to [49]. (B) SoptSC identifies 8 clusters during mouse zygote to 64-cell stage development. (C) Pseudotemporal ordering of mouse embryonic cells by SoptSC. (D) Low dimensional projection using SoptSC of scRNA-seq profiles from 88 single human cells, developmental stages labelled according to [50]. (E) Clustering of human oocyte to blastocyst development identifies 3 populations. (F) Pseudotemporal ordering of human embryonic cells by SoptSC. (G) Eigenspectra derived from the similarity matrix for mouse embryonic data: the number of eigenvalues below the largest gap is indicated by the shaded region. The similarity matrices for the full dataset (all cells) and at two distinct cell stages are also shown. (H) Human gene expression in single cells over pseudotime.

301 By comparison of the known labels (Fig. 5A) with the subpopulations  
302 identified by SoptSC (Fig. 5B), we see that SoptSC clusters the zygote and  
303 the 2-cell stage into a single population, and similarly clusters the 4-cell and  
304 the 8-cell stages together. The 16-cell stage is identified as a single subpopula-  
305 tion. At the 32-cell stage the first bifurcation occurs (forming trophectoderm  
306 and ICM); this can be seen by the two distinct 32-cell stage subpopulations  
307 in Fig. 5A. SoptSC identifies each of these subpopulations ( $C_4$  and  $C_5$ ).  
308 Furthermore we see that a second branching event occurs during the differ-  
309 entiation of cluster  $C_5$  (which we thus can identify as the ICM) and SoptSC  
310 correctly clusters two subsequent 64-cell stage subpopulations distinctly ( $C_6$   
311 and  $C_7$ , corresponding to primitive endoderm and epiblast). A separate  
312 64-cell stage subpopulation ( $C_8$ ) emerges following the differentiation of the  
313 trophectoderm ( $C_4$ ). In Fig. 5C we order the cells along pseudotime, and  
314 see that the inferred pseudotime is consistent with the cellular developmental  
315 stages. Overall, we find that the results of SoptSC are in excellent agreement  
316 with previous analyses of these data and with the known biology [51, 53].

317 Next we ran SoptSC on single-cell RNA-seq data from the very early  
318 stages of human embryo development, published by Yan et al. [50] and  
319 studied further in [54, 55]. The results are shown in Fig. 5D-F,H. The data  
320 consist of 88 cells from seven stages of human early embryonic development,  
321 beginning from the oocyte and transitioning through 2-cell to 8-cell stages  
322 before differentiating into the morula and finally the late blastocyst stage  
323 (approximately 32 cells). We selected 8220 genes from a total of 20,012 based  
324 on two criteria: 1) a minimum gene expression level (FPKM  $> 1$ ) must be  
325 satisfied in at least 50% of the cells; 2) the variance of  $\log_2$ -transformed  
326 FPKM of each gene is larger than 0.5. Fig. 5D shows the distribution of  
327 cells along the seven human early embryo developmental time points (labels  
328 from [50]). We see that SoptSC projects these subpopulations into a single  
329 developmental trajectory.

330 In Fig. 5E we plot the subpopulation structure as identified by SoptSC:  
331 three subpopulations were predicted based on the eigenspectra of the graph  
332 Laplacian, i.e. we predict that overlap between these early developmental  
333 stages leads to fewer functionally different (in gene expression space) sub-  
334 populations. The first four stages (oocyte to 4-cell) are clustered together,  
335 as are the 8-cell and morula stages. The late blastocyst stage is clustered  
336 alone. We note that among the cells studied, the cluster boundaries are dis-  
337 tinguished in perfect agreement at  $C_1/C_2$ , and very good agreement (two cells  
338 mis-classified) at  $C_2/C_3$ . The pseudotemporal trajectory inferred by SoptSC

339 (Fig. 5F shows that the ordering cells by this method is highly consistent  
340 with the known stage of development. To further dissect the pseudotemporal  
341 ordering obtained, we plot six genes previously identified as important mark-  
342 ers [54] along pseudotime (Fig. 5H). We find very good agreement between  
343 the dynamics predicted here and those previously studied [54].

### 344 *3.3. SoptSC reveals new structure within epidermal cell subpopu-* 345 *lations during telogen*

346 The mammalian epidermis is a well-characterized adult stem cell system  
347 [56], yet significant questions remain regarding the constituents of specific  
348 epidermal cell subpopulations and the interactions between them. Cells of  
349 the epidermis exhibit considerable heterogeneity [57], and can transition be-  
350 tween multiple compartments (sometimes crucial for function, see e.g. the  
351 formation of hair follicles [58]). In the interfollicular epidermis (IFE), cells  
352 are highly stratified: a stem cell population in the basal layer maintains the  
353 tissue through proliferation and production of differentiated cells (popula-  
354 tions DI and DII below) and finally keratinized cells (populations KI and  
355 KII below). The keratinized cells form the outermost layer of the skin that  
356 is eventually shed [56].

357 Here we analyze a recent scRNA-seq dataset of murine epidermis taken  
358 during the second telogen [59] in order to assess the effects that such epider-  
359 mal heterogeneity may have on subpopulation structure and pseudotemporal  
360 ordering. Joost et al. [59] performed multi-level clustering in order to identify  
361 the various subpopulations of the epidermis, and found five subpopulations  
362 within the interfollicular epidermis (IFE) at the first level of clustering (Fig.  
363 6A). Here we focus our studies on the IFE, as it likely represents a faithful  
364 trajectory in pseudotime, and we thus analyze 720 single cells using SoptSC.  
365 We select 1523 variable genes as input, based on the criterion that the gene  
366 expression variance  $> 0.8$ . By inspection of the eigenspectra of the graph  
367 Laplacian we predict that eight subpopulations exist within the IFE: three  
368 more than were identified in the first level of clustering by Joost et al., in-  
369 cluding one subpopulation than was not identified at all in their analysis  
370 (including at second level clustering). We visualize the results of SoptSC in  
371 Fig. 6 using the first two dominant components (SO1 and SO2).

372 SoptSC projects the IFE cell population onto a 2D plane that reflects  
373 the known differentiation trajectory of the IFE, and preserves the overall  
374 subpopulation structure identified by Joost et al. (Fig. 6A), although we  
375 also see that in some regions (on the right of the plot) there is overlap where

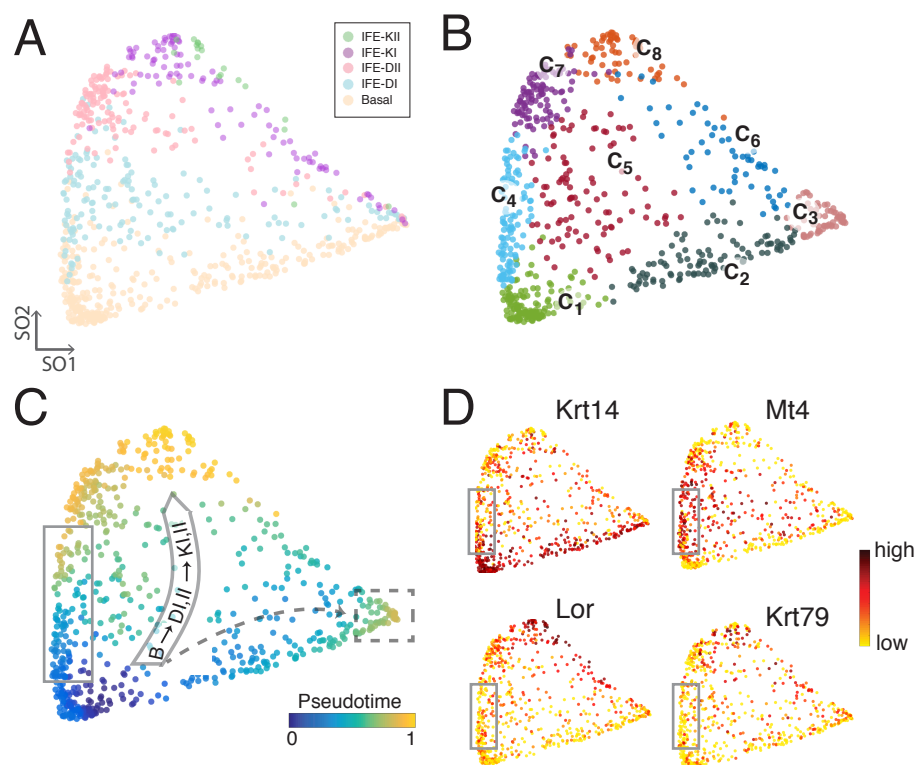

Figure 6: **SoptSC identifies subpopulation structure within the IFE.** (A). Low dimensional projection using SoptSC of 720 single cells from the interfollicular epidermis (IFE); data and cluster labels from [59]. (B). Subpopulations of the IFE identified by SoptSC. (C) Pseudotemporal ordering of IFE cells by SoptSC. Solid gray box marks cells of cluster  $C_4$ ; dashed gray box marks cells of cluster  $C_3$ . Arrows denote putative transition paths through pseudotime. (D) Gene expression of key epidermal markers; gray box marks cells of cluster  $C_4$ .

376 all of the subpopulations meet. SoptSC also captures additional substructure  
377 in the IFE, namely within the basal and differentiated cell populations (Fig.  
378 6B). Of particular interest are clusters  $C_3$  and  $C_4$ , which we will analyze in  
379 greater depth below.

380 In Fig. 6C we order the cells of the IFE in pseudotime and visualize this  
381 developmental trajectory in the same 2D projection by SoptSC. We plot the  
382 gene expression of four epidermal markers across the IFE in Fig. 6D. We  
383 see broad agreement with known epidermal cell biology whereby basal cells  
384 appear earliest and transition through a differentiated cell state to eventu-  
385 ally become keratinized (late in pseudotime). However we also see a rather  
386 dramatic departure from the expected trajectory for the subpopulation  $C_3$ ,  
387 which appears late in pseudotime even though it contains only a few cells  
388 that are (identified as) keratinized, mixed with cells identified as basal and  
389 differentiated. This result highlights that the heterogeneity within IFE sub-  
390 populations is greater than previously known, spanning the whole compart-  
391 ment: putative basal cells appear both at the beginning and at the end of  
392 pseudotime. Whereas Joost et al. hinted at this by saying that “all basal  
393 cells before reaching this point are to some extent plastic” [59], our results go  
394 even further in their prediction of the extent of heterogeneity within the IFE.

395 A priori, one could suggest at least three possible hypotheses to explain  
396 the composition of cluster  $C_3$ : (*i*) the basal cells of  $C_3$  differentiate late; (*ii*)  
397 a subpopulation of differentiated/keratinized cells retains basal cell markers;  
398 or that (*iii*) a subpopulation of differentiated cells is able to dedifferentiate  
399 back to a basal state. Dedifferentiation would imply transition through mid  
400 stages (DI, DII) that are marked by the gene *Mt4* (Fig. 6D), however we see  
401 very low expression of *Mt4* for  $C_3$ , thus providing putative evidence against  
402 hypothesis (*iii*). In addition we know of no examples from the literature of  
403 dedifferentiation occurring in the IFE. Higher expression of stem cell marker  
404 *Krt14* than keratinized cell marker *Lor* (Fig. 6D) leads us to suggest that hy-  
405 pothesis (*i*) may be more likely than hypothesis (*ii*); to resolve this however,  
406 further experiments are needed.

407 In order to assess the composition of subpopulation  $C_4$ , we study the gene  
408 expression of four key epidermal marker genes across the IFE (Fig. 6D, gray  
409 box). The basal subpopulations are marked by high expression of *Krt14*, and  
410 the keratinized subpopulations by high expression of *Lor*, in agreement with  
411 Joost et al. [59]. Expression of *Mt4* is greatest at mid-pseudotime, around  
412 the differentiated cell subpopulations, also in agreement with Joost et al.  
413 Investigating the gene expression in subpopulation  $C_4$ , we find high *Mt4* and

414 relatively high Krt14 expression, but also some expression of Lor and Krt79.  
415 This indicates a mixed population of basal and differentiated cells (in agree-  
416 ment with the labels of Fig 6A), but also suggest a contribution from the  
417 hair follicle compartment, implicating this subpopulation as the infundibu-  
418 lum subpopulation (INFU-B) identified in [59]. Our data thus recapitulate  
419 in a single step the three subpopulations of basal cells that were found during  
420 two levels of clustering, and in addition, delineate the heterogeneity present  
421 within the major subpopulations of the IFE.

### 422 *3.4. SoptSC resolves the monocytic/granulocytic cell fate deci-* 423 *sion directly from high-dimensional scRNA-seq hematopoi-* 424 *etic data*

425 Hematopoiesis is the formation of all blood cells, including erythrocytes,  
426 leukocytes, and platelets, from a rare stem cell residing in the bone marrow  
427 in adult mammals [60]. The rise of single cell sequencing has had a dramatic  
428 impact on our understanding of hematopoiesis: progenitor cell populations  
429 previously resolved (by cell surface markers) within the developmental tra-  
430 jectory between stem and differentiated cells have had their roles/existence  
431 thrown into question, or even putatively discarded, as alternative lineage  
432 paths are drawn and we see the role of heterogeneity expand [10, 61, 12].  
433 Given these recent results, the complexity of the hematopoietic hierarchy,  
434 and the significant levels of heterogeneity yet to be fully accounted for, we  
435 chose to analyse a scRNA-seq dataset describing hematopoiesis in mice [12].  
436 Olsson et al. specifically study myelopoiesis, i.e. the formation of erythro-  
437 cytes, megakaryocytes, monocytes, and granulocytes. We analyze gene ex-  
438 pression in 382 single cells, and select 1567 variable genes as input based on  
439 the criteria: coefficient of variation  $> 3$ ; gene included are expressed in at  
440 least 40% of the cells. We then applied SoptSC to analyze the substructure  
441 of hematopoietic cell populations, their ordering in pseudotime, and their  
442 transition paths during differentiation.

443 We project the cells into low dimension via SoptSC and label them ac-  
444 cording to their surface marker expression [12] in order to visualize the de-  
445 velopmental trajectory (Fig. 7A). We see that there is a visible trajectory  
446 from top left moving downwards and rightwards, but also considerable popu-  
447 lation overlap leading to a lack of distinguishability between the cell surface  
448 marker-labelled subpopulations in this projection. Analysis of the eigenspec-  
449 tra of the graph Laplacian for these data predicts nine subpopulations, the

450 same number of subpopulations as was identified by Olsson et al. via it-  
451 erative clustering and guide gene selection [12]. The clustering results of  
452 SoptSC are shown in Fig. 7B, labelled  $C_1 - C_9$ ; these labels will be discussed  
453 in detail below. Due in part to the complex structure of the hematopoietic  
454 system, this 2D projection cannot completely resolve all the subpopulations  
455 (see also inset for zoom in). We note that we compared SoptSC visualization  
456 with tSNE and found that projecting via tSNE was considerably worse at  
457 capturing this trajectory of myelopoiesis than SoptSC (see S2 Fig. B and  
458 Olsson et al. [12]).

459 Pseudotemporal ordering of cells contributing to myelopoiesis (Fig. 7C)  
460 highlights that there are multiple branch points during differentiation, lead-  
461 ing to three distinct subpopulations at the end of pseudotime on the main  
462 projection, and a fourth that can be identified in the inset; there may be more  
463 branching points that are not resolved on this projection. Inference of the  
464 transition path between subpopulations suggests four final subpopulations  
465 (Fig. 7D). In light of these results we are able to ascribe functional labels to  
466 the subpopulations identified in Fig. 7B.  $C_1$  appears at the top of the tree and  
467 at the start of pseudotime, expressing stemness markers (e.g. high *Gata2* —  
468 Fig. 7E) thus representing multipotent hematopoietic stem/progenitor cells.  
469  $C_2$  and  $C_4$  (Fig. 7B inset) can be identified as erythrocytic and megakary-  
470 ocytic precursors by the expression of *Vwf*, *Klf1*, *EpoR* (See SI Figs). We  
471 note that Fig. 7D infers a transition from erythrocytic to megakaryocytic  
472 progenitor cells: this annotation is probably incorrect; these lineages develop  
473 concurrently. We have however managed to resolve all the other transitions  
474 present in agreement with known biology. Subpopulation  $C_6$  can be identi-  
475 fied as a myelocytic population, as described in [12] with high granulocytic  
476 markers (Fig. 7A [pink/purple] and 7E [*Gfi1*]) and high expression of *Mmp9*  
477 (S2 Fig. C), appearing late in pseudotime.

478 Subpopulations  $C_7 - C_9$  (Fig. 7D, bottom) define the monocytic/granulocytic  
479 cell fate choice, as can be seen from their marker gene expression (Fig. 7E):  
480 the mixed progenitor population expresses *Gata2* and low levels of *Itga2b*;  
481 the monocytic population expresses *Irf8*; and the granulocytic population ex-  
482 presses *Gfi1*. Interestingly, this key monocytic/granulocytic branching point  
483 can be clearly visualized in the 2D projection of SoptSC (Fig. 7B), with  
484 the monocytic cells located at the bottom of the plot ( $C_8$ ) and the granu-  
485 locytic cells on the right hand edge ( $C_9$ ). Moreover, the subpopulation  $C_7$ ,  
486 closely associates with the population identified by Olsson et al. as ‘Multi-  
487 Lin’: playing a crucial role in the regulation of myelopoiesis.  $C_7$  appears

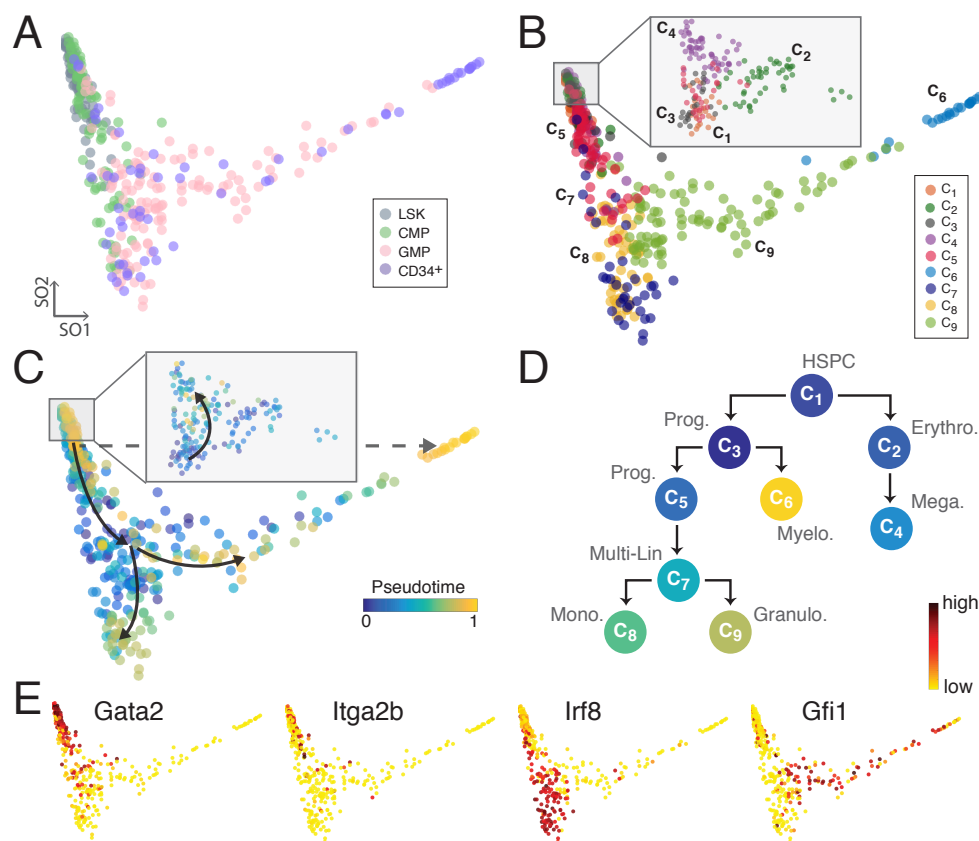

**Figure 7: Sc-RNA-seq subpopulation structure and pseudotemporal ordering during myelopoiesis [12].** (A). Low dimensional projection by SoptSC of 382 single cells from the hematopoietic system. LSK: Lin<sup>-</sup>Sca1<sup>+</sup>c-Kit<sup>+</sup>; CMP: common myeloid progenitor; GMP: granulocyte monocyte progenitor; CD34<sup>+</sup>: LSK CD34<sup>+</sup> cells. (B). Hematopoietic subpopulation structure identified by SoptSC; inset shows zoom in. (C) Pseudotemporal ordering of hematopoietic cells by SoptSC; inset shows zoom in. Arrows show differentiation paths identified in pseudotime. Dashed arrow indicates that the differentiation path lies on a different manifold than the one SoptSC projects onto here. (D) Lineage hierarchy constructed by SoptSC. Colors correspond to the mean pseudotime value for the subpopulation. Hematopoietic population identities have been curated after construction of the lineage hierarchy. HSPC: hematopoietic stem/progenitor cells; Prog: multipotent progenitor; Multi-Lin: mixed progenitor (see [12]); Mono: monocytic progenitor; Granulo: granulocytic progenitor; Myelo: myelocytic progenitor; Erythro: erythrocytic progenitor; Mega: megakaryocytic progenitor. (E) Gene expression of selected marker genes in single cells.



488 spread across large portions of the SoptSC projection, located both around  
489 monocytic cells and granulocytic cells near the bottom of the plot, and inter-  
490 spersed with less differentiated cells situated on the projection above these.  
491 This substantial heterogeneity present within the Multi-Lin subpopulation  
492 corroborates the findings of Olsson et al. Comparison of clusters  $C_8$  and  $C_9$   
493 in pseudotime (Fig. 7C) also reveals an intriguing prediction: that upon  
494 differentiation of the granulocyte-monocyte progenitor, granulocytes appear  
495 earlier, and develop more slowly (i.e. span more of pseudotime) than their  
496 monocytic counterparts.

#### 497 **4. Discussion**

498 Here we have presented SoptSC: similarity matrix optimization for single-  
499 cell analysis, a new method for the identification of subpopulations, and the  
500 reconstruction of pseudotime and cellular transition paths from single cell  
501 gene expression data. SoptSC is based on cell-to-cell similarity scores, which  
502 are obtained by introducing a low-rank optimization model in which the rela-  
503 tionships among cells are represented by a structured similarity matrix [31].  
504 This method preserves the intrinsic geometric structure of the manifold un-  
505 der study by allowing coefficients to be nonzero only in a local neighborhood  
506 of each data point. This low-rank constraint enables the model to better  
507 capture the global structure of a dataset, and improves its robustness to  
508 noise and outliers. These methods lead to a particular strength of SoptSC  
509 — exemplified in the previous two applications — namely its ability to ex-  
510 tract pertinent information from data directly from a high dimensional space  
511 with a large number of clusters; previous analyses of these data [59, 12] first  
512 projected the data into a lower dimension or selected out particular clusters  
513 for study. Other recent approaches have also focussed on analysis of the  
514 geometrical properties of high dimensional data [62].

515 We applied SoptSC to four published datasets on three biological sys-  
516 tems: embryonic development, epidermal homeostasis, and hematopoiesis.  
517 SoptSC showed very good agreement with previously determined subpopu-  
518 lation structure and developmental trajectories, in particular recapitulating  
519 with high accuracy the branching events occurring during early mouse em-  
520 bryo development [49], and development of early human embryo from oocyte  
521 to blastocyst [50]. In addition, scRNA-seq data analysis via SoptSC gen-  
522 erated a number of unintuitive predictions: we found evidence for a label-  
523 promiscuous population of cells within the interfollicular epidermis, marked

524 by a combination of both basal stem and differentiated cell markers, and an  
525 overall higher than previously reported [59] degree of variability between the  
526 epidermal cell populations studied. Analysis of hematopoiesis (specifically  
527 myelopoiesis) in mice [12] led us to identify differences in the developmental  
528 trajectories of granulocytic and monocytic progenitor cells, with the former  
529 appearing earlier and developing more slowly than the latter.

530 Clustering cells and pseudotime reconstruction are performed in SoptSC  
531 using rank- $k$  non-negative matrix factorization (NMF), where  $k > 1$  is the  
532 number of clusters in the data, or for pseudotime,  $k = 1$ . As we have shown  
533 through detailed analyses, high levels of noise lead to significant challenges  
534 for these tasks. We thus proposed a modified algorithm for pseudotemporal  
535 ordering in the presence of noise that proceeds by projecting the similarity  
536 matrix into a lower dimension defined by a set of eigenvectors, before per-  
537 forming rank-1 NMF. We found that this yields more reliable predictions,  
538 however it produces an additional parameter (the number of eigenvectors  
539 used to project) that needs to be set by the user. An improvement to SoptSC  
540 would be to fix the number of eigenvectors according to some criteria, how-  
541 ever defining this generally, rather than in a data-dependent manner, remains  
542 challenging. Another potential extension to SoptSC is to relax the constraint  
543 on  $Z$  that forces non-neighboring cell coefficients to be zero, this could be  
544 achieved using sparse regularization, i.e. by adding a ( $L_1$  regularization)  
545 penalty term to the objective function such that the neighbors of each cell  
546 can be inferred directly (by the non-zero coefficients) from the solution to  
547 the optimization problem.

548 SoptSC provides a prediction of the number of clusters present in a  
549 dataset; this is performed by constructing the graph Laplacian of the con-  
550 sensus similarity matrix, and calculating the number of zeros and the largest  
551 gap in its eigenvalue spectrum. The advantage of this method lies in the  
552 step that inputs (simultaneously) the structures of several similarity matri-  
553 ces to the construction of a consensus matrix; we find that this helps to  
554 increase robustness of the method to noise in the data, relative to, for exam-  
555 ple, approaches based on ensemble methods or iterative consensus clustering  
556 [39, 38]. However challenges remain; it is not always possible to obtain a  
557 good prediction for the number of clusters in a dataset. This ambiguity is  
558 in part inherent to single cell analysis: depending on the level of focus, the  
559 number of relevant subpopulations may change, and this can be confounded  
560 by mixed discrete and continuous cell state transitions [9].

561 Single cell data analysis comes with a particular set of promises and

562 pitfalls. The key strength of scRNA-seq lies in its ability to measure many  
563 signals simultaneously and provide global quantification of the transcriptional  
564 state of a cell. On the other hand, technical challenges (due to amplification,  
565 alignment, dropout, etc [63]) — as well as challenges inherent to the biological  
566 system — make appropriately accounting for the heterogeneity in these data  
567 is a difficult problem. By presenting SoptSC, an optimization-based pipeline  
568 for clustering, pseudotemporal ordering, and cell lineage path reconstruction,  
569 we offer new methods for the analysis of scRNA-seq datasets that can stand  
570 alone or be integrated into existing workflows. We hope that as such, SoptSC  
571 will help to generate insight into emergent biological phenomena in complex  
572 tissues.

## 573 **5. Availability**

574 SoptSC is implemented in MATLAB under a GNU license (GPLv3). The  
575 code is available on GitHub: <https://github.com/WangShuxiong/SoptSC>.

576 **6. Supporting information**

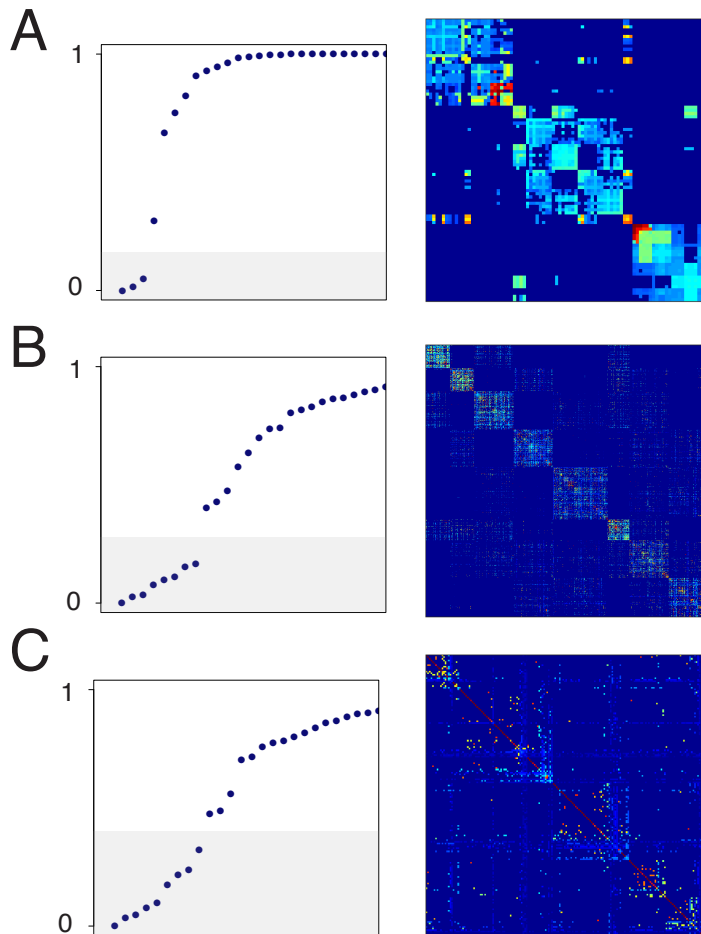

577 *S1 Fig.* **Eigenspectra and similarity matrices for the identification**  
578 **of subpopulations.** The first 25 eigenvalues of the graph Laplacian of the  
579 consensus matrix (left) and the similarity matrix constructed via SoptSC  
580 for (A) the human embryonic dataset studied [50]; (B) the interfollicular  
581 epidermal dataset studied [59]; and (C) the hematopoiesis dataset studied  
582 [12].

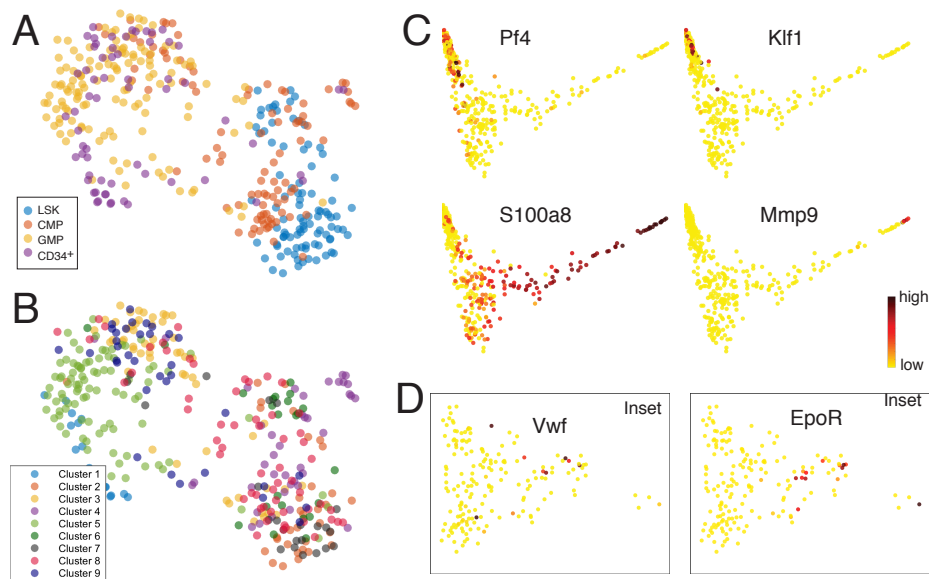

583 *S2 Fig.* Additional analysis of subpopulations and marker genes  
584 from Olsson et al. [12]. (A) tSNE projection of cells labelled by their cell  
585 surface marker expression: LSK: Lin<sup>-</sup>Sca1<sup>+</sup>c-Kit<sup>+</sup>; CMP: common myeloid  
586 progenitor; GMP: granulocyte monocyte progenitor; CD34<sup>+</sup>: LSK CD34<sup>+</sup>  
587 cells. (B) tSNE projection of cells labelled by their clusters as identified by  
588 SOptSC. (C) Gene expression of selected genes projected into 2D via SoptSC  
589 . (D) Gene expression in the inset projections as specified in Fig. 7.

## References

- [1] V. Svensson, R. Vento-Tormo, S. A. Teichmann, Moore's Law in Single Cell Transcriptomics, arXiv (2017) arXiv:1704.01379.
- [2] F. Tang, C. Barbacioru, E. Nordman, B. Li, N. Xu, V. I. Bashkirov, K. Lao, M. A. Surani, RNA-Seq analysis to capture the transcriptome landscape of a single cell, *Nature Protocols* 5 (2010) 516–535.
- [3] D. Ramskld, S. Luo, Y.-C. Wang, R. Li, Q. Deng, O. R. Faridani, G. A. Daniels, I. Khrebtukova, J. F. Loring, L. C. Laurent, G. P. Schroth, R. Sandberg, Full-length mRNA-Seq from single-cell levels of RNA and individual circulating tumor cells, *Nature biotechnology* 30 (2012) 777–782.
- [4] S. Islam, A. Zeisel, S. Joost, G. La Manno, P. Zajac, M. Kasper, P. L nnerberg, S. Linnarsson, Quantitative single-cell RNA-seq with unique molecular identifiers, *Nature Methods* 11 (2013) 163–166.
- [5] D. A. Jaitin, E. Kenigsberg, H. Keren-Shaul, N. Elefant, F. Paul, I. Zaretsky, A. Mildner, N. Cohen, S. Jung, A. Tanay, I. Amit, Massively parallel single-cell RNA-seq for marker-free decomposition of tissues into cell types, *Science* 343 (2014) 776–779.
- [6] C. M. Perou, T. Sørlie, M. B. Eisen, M. van de Rijn, S. S. Jeffrey, C. A. Rees, J. R. Pollack, D. T. Ross, H. Johnsen, L. A. Akslen, et al., Molecular portraits of human breast tumours, *Nature* 406 (2000) 747–752.
- [7] A. Mortazavi, B. A. Williams, K. McCue, L. Schaeffer, B. Wold, Mapping and quantifying mammalian transcriptomes by rna-seq, *Nature methods* 5 (2008) 621–628.
- [8] U. Nagalakshmi, Z. Wang, K. Waern, C. Shou, D. Raha, M. Gerstein, M. Snyder, The transcriptional landscape of the yeast genome defined by rna sequencing, *Science* 320 (2008) 1344–1349.
- [9] N. Moris, C. Pina, A. Martinez Arias, Transition states and cell fate decisions in epigenetic landscapes., *Nature Reviews Genetics* 17 (2016) 693–703.

- [10] F. Paul, Y. Arkin, A. Giladi, D. A. Jaitin, E. Kenigsberg, H. Keren-Shaul, D. Winter, D. Lara-Astiaso, M. Gury, A. Weiner, E. David, N. Cohen, F. K. B. Lauridsen, S. Haas, A. Schlitzer, A. Mildner, F. Ginhoux, S. Jung, A. Trumpp, B. T. Porse, A. Tanay, I. Amit, Transcriptional Heterogeneity and Lineage Commitment in Myeloid Progenitors, *Cell* 163 (2015) 1663–1677.
- [11] D. Grün, A. Lyubimova, L. Kester, K. Wiebrands, O. Basak, N. Sasaki, H. Clevers, A. van Oudenaarden, Single-cell messenger RNA sequencing reveals rare intestinal cell types, *Nature* 525 (2015) 251–255.
- [12] A. Olsson, M. Venkatasubramanian, V. K. Chaudhri, B. J. Aronow, N. Salomonis, H. Singh, H. L. Grimes, Single-cell analysis of mixed-lineage states leading to a binary cell fate choice, *Nature* 537 (2016) 698–702.
- [13] B. Treutlein, D. G. Brownfield, A. R. Wu, N. F. Neff, G. L. Mantalas, F. H. Espinoza, T. J. Desai, M. A. Krasnow, S. R. Quake, Reconstructing lineage hierarchies of the distal lung epithelium using single-cell RNA-seq, *Nature* 509 (2014) 371–375.
- [14] V. Moignard, S. Woodhouse, L. Haghverdi, A. J. Lilly, Y. Tanaka, A. C. Wilkinson, F. Buettner, I. C. Macaulay, W. Jawaid, E. Diamanti, S.-I. Nishikawa, N. Piterman, V. Kouskoff, F. J. Theis, J. Fisher, B. Gottgens, Decoding the regulatory network of early blood development from single-cell gene expression measurements, *Nature biotechnology* 33 (2015) 269–276.
- [15] L.-F. Chu, N. Leng, J. Zhang, Z. Hou, D. Mamott, D. T. Vereide, J. Choi, C. Kendzierski, R. Stewart, J. A. Thomson, Single-cell RNA-seq reveals novel regulators of human embryonic stem cell differentiation to definitive endoderm, *Genome Biology* 17 (2016) 173.
- [16] R. Satija, J. A. Farrell, D. Gennert, A. F. Schier, A. Regev, Spatial reconstruction of single-cell gene expression data, *Nature biotechnology* 33 (2015) 495–502.
- [17] V. Y. Kiselev, K. Kirschner, M. T. Schaub, T. Andrews, A. Yiu, T. Chandra, K. N. Natarajan, W. Reik, M. Barahona, A. R. Green,

- M. Hemberg, SC3: consensus clustering of single-cell RNA-seq data., *Nature Methods* 9 (2017) 2579.
- [18] M. Ringnér, What is principal component analysis?, *Nature Biotechnology* 26 (2008) 303–304.
- [19] L. v. d. Maaten, G. Hinton, Visualizing data using t-sne, *Journal of Machine Learning Research* 9 (2008) 2579–2605.
- [20] T. Hastie, R. Tibshirani, J. Friedman, *The Elements of Statistical Learning*, Springer, 2nd edition, 2009.
- [21] C. Trapnell, D. Cacchiarelli, J. Grimsby, P. Pokharel, S. Li, M. Morse, N. J. Lennon, K. J. Livak, T. S. Mikkelsen, J. L. Rinn, The dynamics and regulators of cell fate decisions are revealed by pseudotemporal ordering of single cells, *Nature biotechnology* 32 (2014) 381–386.
- [22] G.-C. Yuan, L. Cai, M. Elowitz, T. Enver, G. Fan, G. Guo, R. Irizarry, P. Kharchenko, J. Kim, S. Orkin, et al., Challenges and emerging directions in single-cell analysis, *Genome biology* 18 (2017) 84.
- [23] O. B. Poirion, X. Zhu, T. Ching, L. Garmire, Single-cell transcriptomics bioinformatics and computational challenges, *Frontiers in Genetics* 7 (2016).
- [24] J. D. Welch, A. J. Hartemink, J. F. Prins, Slicer: inferring branched, nonlinear cellular trajectories from single cell rna-seq data, *Genome biology* 17 (2016) 106.
- [25] L. Haghverdi, M. Buettner, F. A. Wolf, F. Buettner, F. J. Theis, Diffusion pseudotime robustly reconstructs lineage branching, *Nature Methods* 13 (2016) 845–848.
- [26] J. Nocedal, S. Wright, *Numerical optimization*, Springer Science & Business Media, 2006.
- [27] W. Sun, Y.-X. Yuan, *Optimization theory and methods: nonlinear programming*, volume 1, Springer Science & Business Media, 2006.
- [28] H. Sayyaadi, M. H. Ahmadi, S. Dehghani, Optimal design of a solar-driven heat engine based on thermal and ecological criteria, *Journal of Energy Engineering* 141 (2014) 04014012.



- [29] F. Brauer, C. Castillo-Chavez, *Mathematical models in population biology and epidemiology*, volume 40, Springer Science & Business Media, 2011.
- [30] J. Monk, J. Nogales, B. O. Palsson, Optimizing genome-scale network reconstructions, *Nature biotechnology* 32 (2014) 447–452.
- [31] L. Zhuang, J. Wang, Z. Lin, A. Y. Yang, Y. Ma, N. Yu, Locality-preserving low-rank representation for graph construction from nonlinear manifolds, *Neurocomputing* 175 (2016) 715–722.
- [32] J. H. Friedman, J. L. Bentley, R. A. Finkel, An algorithm for finding best matches in logarithmic expected time, *ACM Transactions on Mathematical Software (TOMS)* 3 (1977) 209–226.
- [33] S. T. Roweis, L. K. Saul, Nonlinear dimensionality reduction by locally linear embedding, *science* 290 (2000) 2323–2326.
- [34] D. Kuang, S. Yun, H. Park, Symnmf: nonnegative low-rank approximation of a similarity matrix for graph clustering, *Journal of Global Optimization* 62 (2015) 545–574.
- [35] D. Kuang, C. Ding, H. Park, Symmetric nonnegative matrix factorization for graph clustering, in: *Proceedings of the 2012 SIAM international conference on data mining*, SIAM, pp. 106–117.
- [36] G. Liu, Z. Lin, S. Yan, J. Sun, Y. Yu, Y. Ma, Robust recovery of subspace structures by low-rank representation, *IEEE Transactions on Pattern Analysis and Machine Intelligence* 35 (2013) 171–184.
- [37] C. Boutsidis, E. Gallopoulos, Svd based initialization: A head start for nonnegative matrix factorization, *Pattern Recognition* 41 (2008) 1350–1362.
- [38] U. Von Luxburg, A tutorial on spectral clustering, *Statistics and computing* 17 (2007) 395–416.
- [39] C. Meyer, S. Race, K. Valakuzhy, Determining the number of clusters via iterative consensus clustering, in: *Proceedings of the 2013 SIAM International Conference on Data Mining*, SIAM, pp. 94–102.

- [40] V. Y. Kiselev, K. Kirschner, M. T. Schaub, T. Andrews, A. Yiu, T. Chandra, K. N. Natarajan, W. Reik, M. Barahona, A. R. Green, et al., Sc3-consensus clustering of single-cell rna-seq data, *bioRxiv* (2016) 036558.
- [41] M. Nascimento, F. de Toledo, A. Carvalho, Consensus clustering using spectral theory, *Advances in Neuro-Information Processing* (2009) 461–468.
- [42] I. Jolliffe, *Principal component analysis*, Wiley Online Library, 2002.
- [43] B. Wang, J. Zhu, E. Pierson, D. Ramazzotti, S. Batzoglou, Visualization and analysis of single-cell rna-seq data by kernel-based similarity learning, *Nature Methods* 14 (2017) 414–416.
- [44] D. Arthur, S. Vassilvitskii, k-means++: The advantages of careful seeding, in: *Proceedings of the eighteenth annual ACM-SIAM symposium on Discrete algorithms*, Society for Industrial and Applied Mathematics, pp. 1027–1035.
- [45] A. Strehl, J. Ghosh, Cluster ensembles—a knowledge reuse framework for combining multiple partitions, *Journal of machine learning research* 3 (2002) 583–617.
- [46] N. X. Vinh, J. Epps, J. Bailey, Information theoretic measures for clusterings comparison: Variants, properties, normalization and correction for chance, *Journal of Machine Learning Research* 11 (2010) 2837–2854.
- [47] D. A. G. Card, P. B. Hebbar, L. Li, K. W. Trotter, Y. Komatsu, Y. Mishina, T. K. Archer, Oct4/Sox2-regulated miR-302 targets cyclin D1 in human embryonic stem cells., *Molecular and Cellular Biology* 28 (2008) 6426–6438.
- [48] F. von Meyenn, M. Iurlaro, E. Habibi, N. Q. Liu, A. Salehzadeh-Yazdi, F. Santos, E. Petrini, I. Milagre, M. Yu, Z. Xie, L. I. Kroeze, T. B. Nesterova, J. H. Jansen, H. Xie, C. He, W. Reik, H. G. Stunnenberg, Impairment of DNA Methylation Maintenance Is the Main Cause of Global Demethylation in Naive Embryonic Stem Cells, *Molecular Cell* 62 (2016) 848–861.

- [49] G. Guo, M. Huss, G. Q. Tong, C. Wang, L. L. Sun, N. D. Clarke, P. Robson, Resolution of cell fate decisions revealed by single-cell gene expression analysis from zygote to blastocyst, *Developmental cell* 18 (2010) 675–685.
- [50] L. Yan, M. Yang, H. Guo, L. Yang, J. Wu, R. Li, P. Liu, Y. Lian, X. Zheng, J. Yan, et al., Single-cell rna-seq profiling of human preimplantation embryos and embryonic stem cells, *Nature structural & molecular biology* 20 (2013) 1131–1139.
- [51] E. Marco, R. L. Karp, G. Guo, P. Robson, A. H. Hart, L. Trippa, G.-C. Yuan, Bifurcation analysis of single-cell gene expression data reveals epigenetic landscape, *Proceedings of the National Academy of Sciences* 111 (2014) E5643–E5650.
- [52] J. Rossant, P. P. Tam, Blastocyst lineage formation, early embryonic asymmetries and axis patterning in the mouse, *Development* 136 (2009) 701–713.
- [53] L. Haghverdi, F. Buettner, F. J. Theis, Diffusion maps for high-dimensional single-cell analysis of differentiation data, *Bioinformatics* 31 (2015) 2989–2998.
- [54] M. Guo, E. L. Bao, M. Wagner, J. A. Whitsett, Y. Xu, Slice: determining cell differentiation and lineage based on single cell entropy, *Nucleic Acids Research* (2016) gkw1278.
- [55] M. Guo, H. Wang, S. S. Potter, J. A. Whitsett, Y. Xu, Sincera: a pipeline for single-cell rna-seq profiling analysis, *PLoS Comput Biol* 11 (2015) e1004575.
- [56] C. Blanpain, E. Fuchs, Epidermal Stem Cells of the Skin, *Annual Review of Cell and Developmental Biology* 22 (2006) 339–373.
- [57] H. Yang, R. C. Adam, Y. Ge, Z. L. Hua, E. Fuchs, Epithelial-Mesenchymal Micro-niches Govern Stem Cell Lineage Choices, *Cell* 169 (2017) 1–14.
- [58] J. W. Oh, J. Kloepper, E. A. Langan, Y. Kim, J. Yeo, M. J. Kim, T.-C. Hsi, C. Rose, G. S. Yoon, S.-J. Lee, J. Seykora, J. C. Kim, Y. K. Sung, M. Kim, R. Paus, M. V. Plikus, A Guide to Studying Human

- Hair Follicle Cycling In Vivo, *Journal of Investigative Dermatology* 136 (2016) 34–44.
- [59] S. Joost, A. Zeisel, T. Jacob, X. Sun, G. La Manno, P. Lönnerberg, S. Linnarsson, M. Kasper, Single-Cell Transcriptomics Reveals that Differentiation and Spatial Signatures Shape Epidermal and Hair Follicle Heterogeneity, *Cell Systems* 3 (2016) 221–237.e9.
- [60] S. J. Morrison, D. T. Scadden, The bone marrow niche for haematopoietic stem cells, *Nature* 505 (2014) 327–334.
- [61] F. Notta, S. Zandi, N. Takayama, S. Dobson, O. I. Gan, G. Wilson, K. B. Kaufmann, J. McLeod, E. Laurenti, C. F. Dunant, J. D. McPherson, L. D. Stein, Y. Dror, J. E. Dick, Distinct routes of lineage development reshape the human blood hierarchy across ontogeny, *Science* 351 (2016) aab2116–aab2116.
- [62] Y. Hart, H. Sheftel, J. Hausser, P. Szekely, N. B. Ben-Moshe, Y. Korem, A. Tendler, A. E. Mayo, U. Alon, Inferring biological tasks using Pareto analysis of high-dimensional data, *Nature Methods* 12 (2015) 233–235.
- [63] O. Stegle, S. A. Teichmann, J. C. Marioni, Computational and analytical challenges in single-cell transcriptomics., *Nature Reviews Genetics* 16 (2015) 133–145.
